# Supplementary material
Source: PubMed Central journal article supplement (PMC3318637)
Supplement: supp_86.8.4538_FigS1_TableS1.pdf [file supp_86.8.4538_FigS1_TableS1.pdf]

**A)**

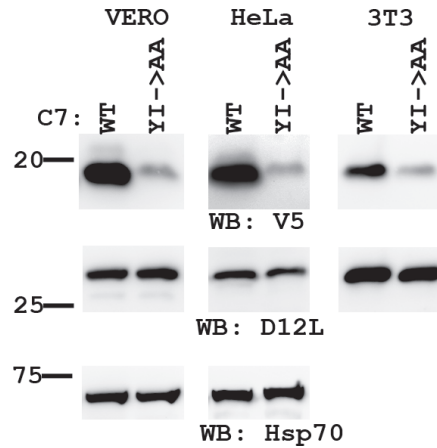

**B)**

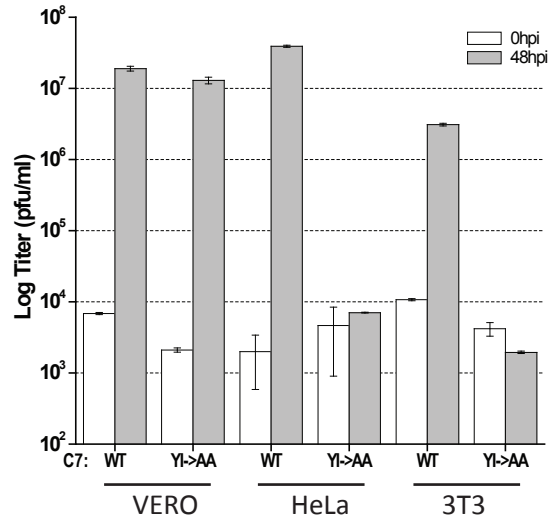

**Supplemental figure 1.** Tyr135 and Ile136 are critical for the function of VACV C7. **(A)**

A recombinant VACV was generated by introducing to vK1L-C7L a C7L with alanine substitutions at Tyr135 and Ile136. This virus (C7:YI->AA) or vVACV-C7L (C7:WT) were used to infect the indicated cell lines at a MOI of 5. At 8 hpi, Western blot were performed as described in legend to Fig. 2B. **(B)**. The cells were infected by the indicated viruses at a MOI of 0.5 PFU/cell. Virus titers at 0 and 48 hpi were determined by plaque assay on the permissive VERO cells.

**Supplementary Table 1.** Large scale ISG screens for VACV WT-GFP<sup>+</sup> and vK1L<sup>-</sup>C7L<sup>-</sup>/GFP<sup>+</sup>.

This table shows complete data sets from large scale ISG screens. For both viruses, replication levels, normalized to Fluc control, are shown with  $z$  scores. Data are ranked by differential  $z$  score, with genes preferentially inhibiting vK1L<sup>-</sup>C7L<sup>-</sup>/GFP<sup>+</sup> ranked first. The 100% normalization value was determined from the average of 3 independent preparations of Fluc.ires.TagRFP lentiviral pseudoparticles. Common ISG aliases: BST2 - tetherin, C19orf66 - FLJ11286, DDX58 - RIG-I, DDX60 - FLJ20035, DHX58 - LGP2, EIF2AK2 - PKR, IDO1 - INDO, IFI6 - G1P3 / 6-16, IFIH1 - MDA5, IFIT1 - ISG56, IFIT2 - ISG54, IFIT3 - ISG50, IFIT5 - ISG58, IFITM1 - 9-27, IFITM2 - 1-8D, IFITM3 - 1-8U, PSMB8 - LMP7, PSMB9 - LMP2, PSMB10 - MECL1, NAMPT - PBEF1, RSAD2 - viperin, ZBP1 - DAI, ZC3HAV1- ZAP.

Supplementary Table 1. Large scale ISG screen: VACV WT-GFP+ and vK1L-C7L-/GFP+ in Huh7 cells (Page 1 of 4)

| Gene     | VACV WT-GFP+     |         | vK1L-C7L-/GFP+   |         | Differential Z score | Gene     | VACV WT-GFP+     |         | vK1L-C7L-/GFP+   |         | Differential Z score |
|----------|------------------|---------|------------------|---------|----------------------|----------|------------------|---------|------------------|---------|----------------------|
|          | Percent Infected | Z score | Percent Infected | Z score |                      |          | Percent Infected | Z score | Percent Infected | Z score |                      |
| TRIM25   | 140.9            | 3.13    | 73.7             | -3.39   | <b>-6.52</b>         | KIAA1618 | 113.3            | 0.56    | 103.7            | -0.37   | <b>-0.93</b>         |
| IRF1     | 120.4            | 1.22    | 87.7             | -1.98   | <b>-3.21</b>         | CEBPD    | 107.3            | 0.00    | 98.1             | -0.93   | <b>-0.93</b>         |
| IRF2     | 137.9            | 2.85    | 109.9            | 0.24    | <b>-2.61</b>         | DDIT4    | 100.7            | -0.62   | 92.3             | -1.52   | <b>-0.90</b>         |
| PRKD2    | 134.1            | 2.50    | 108.1            | 0.06    | <b>-2.43</b>         | DDX58    | 150.8            | 4.05    | 138.9            | 3.16    | <b>-0.90</b>         |
| THOC4    | 119.4            | 1.13    | 96.3             | -1.11   | <b>-2.24</b>         | MT1G     | 98.4             | -0.83   | 90.5             | -1.70   | <b>-0.87</b>         |
| MT1F     | 118.6            | 1.06    | 96.1             | -1.14   | <b>-2.20</b>         | CD69     | 118.4            | 1.03    | 109.1            | 0.17    | <b>-0.87</b>         |
| ERLIN1   | 117.6            | 0.96    | 97.1             | -1.04   | <b>-2.00</b>         | Fluc     | 100.7            | -0.62   | 92.8             | -1.47   | <b>-0.85</b>         |
| STAT2    | 111.8            | 0.42    | 92.0             | -1.55   | <b>-1.97</b>         | HERC6    | 111.0            | 0.35    | 102.5            | -0.50   | <b>-0.85</b>         |
| FLJ39739 | 118.1            | 1.01    | 99.4             | -0.81   | <b>-1.82</b>         | PUS1     | 111.0            | 0.35    | 102.7            | -0.47   | <b>-0.82</b>         |
| CCNA1    | 124.5            | 1.60    | 105.5            | -0.19   | <b>-1.79</b>         | PNPT1    | 104.7            | -0.24   | 96.9             | -1.06   | <b>-0.82</b>         |
| PPM1K    | 120.7            | 1.25    | 102.2            | -0.52   | <b>-1.77</b>         | PI4K2B   | 102.4            | -0.45   | 94.8             | -1.27   | <b>-0.81</b>         |
| ADM      | 114.8            | 0.70    | 97.6             | -0.99   | <b>-1.69</b>         | DHX58    | 116.1            | 0.82    | 107.6            | 0.01    | <b>-0.81</b>         |
| C1S      | 124.5            | 1.60    | 106.8            | -0.06   | <b>-1.66</b>         | ABLIM3   | 113.1            | 0.54    | 104.8            | -0.27   | <b>-0.81</b>         |
| RNF19B   | 112.8            | 0.51    | 96.3             | -1.11   | <b>-1.63</b>         | MKX      | 117.6            | 0.96    | 109.1            | 0.17    | <b>-0.80</b>         |
| CCR1     | 122.7            | 1.43    | 106.0            | -0.14   | <b>-1.58</b>         | OAS2     | 124.7            | 1.62    | 116.0            | 0.86    | <b>-0.77</b>         |
| UNC84B   | 113.1            | 0.54    | 97.4             | -1.01   | <b>-1.55</b>         | NCF1     | 104.2            | -0.29   | 97.1             | -1.04   | <b>-0.75</b>         |
| IFITM3   | 115.6            | 0.77    | 99.9             | -0.76   | <b>-1.53</b>         | BLVRA    | 102.4            | -0.45   | 95.8             | -1.16   | <b>-0.71</b>         |
| ZNF385B  | 117.9            | 0.99    | 102.5            | -0.50   | <b>-1.49</b>         | IL15     | 100.7            | -0.62   | 94.3             | -1.32   | <b>-0.70</b>         |
| TAP1     | 125.2            | 1.67    | 109.6            | 0.22    | <b>-1.45</b>         | HEG1     | 120.4            | 1.22    | 112.7            | 0.52    | <b>-0.70</b>         |
| IL1RN    | 117.1            | 0.92    | 102.2            | -0.52   | <b>-1.44</b>         | MCOLN2   | 107.5            | 0.02    | 100.7            | -0.68   | <b>-0.70</b>         |
| C5orf39  | 120.2            | 1.20    | 105.3            | -0.22   | <b>-1.42</b>         | HLA-C    | 98.7             | -0.81   | 92.5             | -1.50   | <b>-0.69</b>         |
| NOD2     | 111.6            | 0.40    | 97.4             | -1.01   | <b>-1.41</b>         | CCND3    | 96.1             | -1.04   | 90.2             | -1.73   | <b>-0.68</b>         |
| MT1M     | 115.6            | 0.77    | 101.4            | -0.60   | <b>-1.38</b>         | GMPR     | 108.5            | 0.11    | 102.0            | -0.55   | <b>-0.66</b>         |
| ARHGEF3  | 116.1            | 0.82    | 102.0            | -0.55   | <b>-1.37</b>         | SPSB1    | 113.8            | 0.61    | 107.1            | -0.04   | <b>-0.65</b>         |
| HSH2D    | 122.9            | 1.46    | 108.6            | 0.11    | <b>-1.34</b>         | CYP1B1   | 111.8            | 0.42    | 105.3            | -0.22   | <b>-0.64</b>         |
| TNFAIP3  | 114.8            | 0.70    | 101.2            | -0.63   | <b>-1.33</b>         | IFI35    | 112.3            | 0.47    | 105.8            | -0.17   | <b>-0.63</b>         |
| LIPA     | 109.0            | 0.16    | 96.1             | -1.14   | <b>-1.30</b>         | FUT4     | 117.6            | 0.96    | 110.9            | 0.34    | <b>-0.62</b>         |
| TIMP1    | 122.2            | 1.39    | 108.3            | 0.09    | <b>-1.30</b>         | FNDC4    | 101.4            | -0.55   | 95.8             | -1.16   | <b>-0.62</b>         |
| SCARB2   | 115.9            | 0.80    | 102.5            | -0.50   | <b>-1.30</b>         | FAM134B  | 106.2            | -0.10   | 100.4            | -0.70   | <b>-0.60</b>         |
| SAMD4A   | 114.3            | 0.66    | 101.2            | -0.63   | <b>-1.28</b>         | DUSP5    | 107.0            | -0.03   | 101.2            | -0.63   | <b>-0.60</b>         |
| C5orf27  | 113.1            | 0.54    | 100.4            | -0.70   | <b>-1.24</b>         | TBX3     | 130.5            | 2.17    | 123.1            | 1.57    | <b>-0.59</b>         |
| CRY1     | 96.1             | -1.04   | 84.9             | -2.26   | <b>-1.22</b>         | TNFAIP6  | 114.3            | 0.66    | 108.1            | 0.06    | <b>-0.59</b>         |
| NPAS2    | 116.6            | 0.87    | 104.0            | -0.35   | <b>-1.21</b>         | SNN      | 121.2            | 1.29    | 114.4            | 0.70    | <b>-0.59</b>         |
| IRF7     | 113.6            | 0.59    | 101.4            | -0.60   | <b>-1.19</b>         | NUP50    | 119.9            | 1.18    | 113.4            | 0.60    | <b>-0.57</b>         |
| UPP2     | 120.9            | 1.27    | 108.6            | 0.11    | <b>-1.16</b>         | STAP1    | 110.3            | 0.28    | 104.5            | -0.29   | <b>-0.57</b>         |
| HLA-F    | 115.6            | 0.77    | 103.7            | -0.37   | <b>-1.15</b>         | CRP      | 117.6            | 0.96    | 111.4            | 0.40    | <b>-0.57</b>         |
| C4orf32  | 119.4            | 1.13    | 107.3            | -0.01   | <b>-1.14</b>         | LGALS9   | 111.8            | 0.42    | 106.0            | -0.14   | <b>-0.56</b>         |
| G6PC     | 120.4            | 1.22    | 108.3            | 0.09    | <b>-1.13</b>         | GCH1     | 115.1            | 0.73    | 109.1            | 0.17    | <b>-0.56</b>         |
| RSAD2    | 107.3            | 0.00    | 96.3             | -1.11   | <b>-1.11</b>         | P2RY6    | 116.4            | 0.84    | 110.4            | 0.29    | <b>-0.55</b>         |
| GBP4     | 108.3            | 0.09    | 97.4             | -1.01   | <b>-1.10</b>         | ATF3     | 107.0            | -0.03   | 101.7            | -0.58   | <b>-0.55</b>         |
| IL6ST    | 124.7            | 1.62    | 112.7            | 0.52    | <b>-1.10</b>         | CD163    | 126.0            | 1.74    | 119.5            | 1.21    | <b>-0.53</b>         |
| PTMA     | 111.8            | 0.42    | 100.7            | -0.68   | <b>-1.10</b>         | NAPA     | 100.2            | -0.67   | 95.6             | -1.19   | <b>-0.52</b>         |
| ULK4     | 118.6            | 1.06    | 107.3            | -0.01   | <b>-1.07</b>         | CLEC2B   | 106.7            | -0.05   | 101.7            | -0.58   | <b>-0.52</b>         |
| MICB     | 103.5            | -0.36   | 93.3             | -1.42   | <b>-1.06</b>         | RGS1     | 103.7            | -0.34   | 98.9             | -0.86   | <b>-0.52</b>         |
| EHD4     | 101.9            | -0.50   | 92.0             | -1.55   | <b>-1.05</b>         | C10orf10 | 113.6            | 0.59    | 108.1            | 0.06    | <b>-0.52</b>         |
| NMI      | 100.7            | -0.62   | 91.0             | -1.65   | <b>-1.03</b>         | TAGAP    | 123.9            | 1.55    | 117.8            | 1.04    | <b>-0.52</b>         |
| PIM3     | 110.8            | 0.33    | 100.7            | -0.68   | <b>-1.00</b>         | HK2      | 115.3            | 0.75    | 109.9            | 0.24    | <b>-0.51</b>         |
| KIAA0082 | 112.1            | 0.44    | 102.0            | -0.55   | <b>-0.99</b>         | RIK2     | 119.6            | 1.15    | 113.9            | 0.65    | <b>-0.50</b>         |
| MTHFD2L  | 101.7            | -0.52   | 92.5             | -1.50   | <b>-0.97</b>         | APOL2    | 116.9            | 0.89    | 111.4            | 0.40    | <b>-0.50</b>         |
| CX3CL1   | 112.6            | 0.49    | 102.7            | -0.47   | <b>-0.96</b>         | GLRX     | 120.2            | 1.20    | 114.4            | 0.70    | <b>-0.50</b>         |

Supplementary Table 1. Large scale ISG screen: VACV WT-GFP+ and vK1L-C7L-/GFP+ in Huh7 cells (Page 2 of 4)

| Gene     | VACV WT-GFP+     |         | vK1L-C7L-/GFP+   |         | Differential Z score | Gene     | VACV WT-GFP+     |         | vK1L-C7L-/GFP+   |         | Differential Z score |
|----------|------------------|---------|------------------|---------|----------------------|----------|------------------|---------|------------------|---------|----------------------|
|          | Percent Infected | Z score | Percent Infected | Z score |                      |          | Percent Infected | Z score | Percent Infected | Z score |                      |
| GBP5     | 105.0            | -0.22   | 100.4            | -0.70   | -0.49                | MT1H     | 91.3             | -1.49   | 91.8             | -1.57   | -0.08                |
| TMEM51   | 118.4            | 1.03    | 112.9            | 0.55    | -0.48                | SIRPA    | 101.4            | -0.55   | 101.2            | -0.63   | -0.08                |
| FAM125B  | 121.7            | 1.34    | 116.0            | 0.86    | -0.48                | CES1     | 108.5            | 0.11    | 108.1            | 0.06    | -0.05                |
| SLC16A1  | 108.8            | 0.14    | 104.0            | -0.35   | -0.48                | FCGR1A   | 109.0            | 0.16    | 108.6            | 0.11    | -0.05                |
| ISG20    | 115.9            | 0.80    | 110.6            | 0.32    | -0.48                | UNC93B1  | 104.2            | -0.29   | 104.2            | -0.32   | -0.03                |
| GAK      | 104.5            | -0.26   | 100.2            | -0.73   | -0.47                | IL17RB   | 117.4            | 0.94    | 116.5            | 0.91    | -0.03                |
| LMO2     | 127.7            | 1.91    | 121.8            | 1.44    | -0.46                | HLA-E    | 101.2            | -0.57   | 101.4            | -0.60   | -0.03                |
| LRG1     | 89.5             | -1.66   | 86.4             | -2.11   | -0.45                | SERPINB9 | 91.6             | -1.47   | 92.5             | -1.50   | -0.03                |
| HES4     | 96.4             | -1.02   | 93.0             | -1.45   | -0.43                | COMMD3   | 108.3            | 0.09    | 108.1            | 0.06    | -0.03                |
| MAX      | 101.7            | -0.52   | 98.1             | -0.93   | -0.41                | TYMP     | 93.1             | -1.33   | 94.1             | -1.34   | -0.02                |
| NT5C3    | 99.9             | -0.69   | 97.1             | -1.04   | -0.35                | SLC25A28 | 100.2            | -0.67   | 100.7            | -0.68   | -0.01                |
| FAM46A   | 106.7            | -0.05   | 103.5            | -0.40   | -0.35                | ALDH1A1  | 109.0            | 0.16    | 109.1            | 0.17    | 0.01                 |
| SLC25A30 | 116.6            | 0.87    | 112.7            | 0.52    | -0.34                | Fluc     | 106.0            | -0.12   | 106.3            | -0.12   | 0.01                 |
| DNAPTP6  | 113.8            | 0.61    | 110.1            | 0.27    | -0.34                | TRIM14   | 97.6             | -0.90   | 98.6             | -0.88   | 0.02                 |
| IFITM3   | 112.1            | 0.44    | 108.6            | 0.11    | -0.33                | SERPINE1 | 99.9             | -0.69   | 100.9            | -0.65   | 0.04                 |
| STAT1    | 112.6            | 0.49    | 109.1            | 0.17    | -0.33                | HPSE     | 100.9            | -0.59   | 102.0            | -0.55   | 0.04                 |
| SLC15A3  | 99.7             | -0.71   | 97.1             | -1.04   | -0.32                | PDGFRL   | 105.2            | -0.19   | 106.0            | -0.14   | 0.05                 |
| CCL2     | 107.5            | 0.02    | 104.5            | -0.29   | -0.31                | SECTM1   | 106.0            | -0.12   | 106.8            | -0.06   | 0.06                 |
| FBXO6    | 112.3            | 0.47    | 109.1            | 0.17    | -0.30                | WARS     | 96.4             | -1.02   | 97.9             | -0.96   | 0.06                 |
| HLA-G    | 103.5            | -0.36   | 100.9            | -0.65   | -0.29                | ATP10D   | 103.2            | -0.38   | 104.2            | -0.32   | 0.06                 |
| GBP2     | 107.3            | 0.00    | 104.5            | -0.29   | -0.29                | LAP3     | 103.2            | -0.38   | 104.2            | -0.32   | 0.06                 |
| PRIC285  | 101.4            | -0.55   | 99.2             | -0.83   | -0.28                | AXUD1    | 110.3            | 0.28    | 110.9            | 0.34    | 0.07                 |
| CD38     | 111.6            | 0.40    | 108.6            | 0.11    | -0.28                | USP18    | 97.4             | -0.93   | 98.9             | -0.86   | 0.07                 |
| ADFP     | 101.9            | -0.50   | 99.7             | -0.78   | -0.28                | GBP3     | 107.3            | 0.00    | 108.1            | 0.06    | 0.07                 |
| JUNB     | 97.1             | -0.95   | 95.3             | -1.22   | -0.27                | GCA      | 107.3            | 0.00    | 108.1            | 0.06    | 0.07                 |
| PSCD1    | 97.4             | -0.93   | 95.6             | -1.19   | -0.26                | CFB      | 118.4            | 1.03    | 118.5            | 1.11    | 0.08                 |
| C4orf33  | 114.3            | 0.66    | 111.4            | 0.40    | -0.26                | IFNGR1   | 125.5            | 1.69    | 125.1            | 1.78    | 0.08                 |
| ZBP1     | 111.3            | 0.37    | 108.6            | 0.11    | -0.26                | PNRC1    | 97.4             | -0.93   | 99.2             | -0.83   | 0.09                 |
| MAFB     | 114.8            | 0.70    | 111.9            | 0.45    | -0.26                | IFIT1    | 99.7             | -0.71   | 101.4            | -0.60   | 0.11                 |
| C9orf91  | 103.2            | -0.38   | 101.2            | -0.63   | -0.25                | ANGPTL1  | 106.2            | -0.10   | 107.6            | 0.01    | 0.11                 |
| RARRES3  | 106.0            | -0.12   | 104.0            | -0.35   | -0.22                | FAM46C   | 117.1            | 0.92    | 117.8            | 1.04    | 0.12                 |
| IRF9     | 109.8            | 0.23    | 107.6            | 0.01    | -0.22                | ISG15    | 94.6             | -1.18   | 96.9             | -1.06   | 0.12                 |
| C9orf19  | 136.3            | 2.71    | 132.3            | 2.49    | -0.22                | BST2     | 122.2            | 1.39    | 122.6            | 1.52    | 0.13                 |
| BTN3A3   | 112.1            | 0.44    | 109.9            | 0.24    | -0.20                | GJA4     | 109.8            | 0.23    | 111.1            | 0.37    | 0.14                 |
| CASP7    | 109.5            | 0.21    | 107.6            | 0.01    | -0.20                | AMPH     | 114.6            | 0.68    | 115.7            | 0.83    | 0.15                 |
| GTPBP2   | 107.0            | -0.03   | 105.3            | -0.22   | -0.19                | WHDC1    | 95.1             | -1.14   | 97.6             | -0.99   | 0.15                 |
| PSMB9    | 121.2            | 1.29    | 118.5            | 1.11    | -0.18                | TAP2     | 104.2            | -0.29   | 106.3            | -0.12   | 0.17                 |
| CSDA     | 99.2             | -0.76   | 98.1             | -0.93   | -0.17                | NRN1     | 105.7            | -0.15   | 107.8            | 0.04    | 0.18                 |
| ARG2     | 105.7            | -0.15   | 104.2            | -0.32   | -0.17                | OPTN     | 97.1             | -0.95   | 99.9             | -0.76   | 0.19                 |
| B4GALT5  | 109.8            | 0.23    | 108.1            | 0.06    | -0.17                | VEGFC    | 94.1             | -1.23   | 97.1             | -1.04   | 0.20                 |
| RASSF4   | 107.3            | 0.00    | 105.8            | -0.17   | -0.16                | BAG1     | 104.0            | -0.31   | 106.3            | -0.12   | 0.20                 |
| MARCKS   | 112.3            | 0.47    | 110.6            | 0.32    | -0.15                | ADAMDEC1 | 97.6             | -0.90   | 100.4            | -0.70   | 0.20                 |
| GK       | 107.0            | -0.03   | 105.8            | -0.17   | -0.14                | OASL     | 134.1            | 2.50    | 134.3            | 2.70    | 0.20                 |
| PCTK2    | 113.6            | 0.59    | 111.9            | 0.45    | -0.14                | LGALS3   | 99.2             | -0.76   | 102.0            | -0.55   | 0.21                 |
| SAMHD1   | 107.5            | 0.02    | 106.3            | -0.12   | -0.13                | SSBP3    | 96.1             | -1.04   | 99.2             | -0.83   | 0.21                 |
| XAF1     | 115.3            | 0.75    | 113.7            | 0.63    | -0.12                | ETV7     | 92.3             | -1.40   | 95.8             | -1.16   | 0.23                 |
| STARD5   | 105.7            | -0.15   | 104.8            | -0.27   | -0.12                | MX1      | 113.3            | 0.56    | 115.5            | 0.81    | 0.24                 |
| AKT3     | 90.6             | -1.56   | 91.0             | -1.65   | -0.09                | PBEF1    | 108.3            | 0.09    | 111.1            | 0.37    | 0.28                 |
| ANKRD22  | 116.9            | 0.89    | 115.5            | 0.81    | -0.09                | IL28RA   | 99.4             | -0.74   | 103.0            | -0.45   | 0.29                 |
| RAB27A   | 107.5            | 0.02    | 106.8            | -0.06   | -0.08                | JAK2     | 113.3            | 0.56    | 116.2            | 0.88    | 0.32                 |

Supplementary Table 1. Large scale ISG screen: VACV WT-GFP+ and vK1L-C7L-/GFP+ in Huh7 cells (Page 3 of 4)

| Gene      | VACV WT-GFP+     |         | vK1L-C7L-/GFP+   |         | Differential Z score | Gene     | VACV WT-GFP+     |         | vK1L-C7L-/GFP+   |         | Differential Z score |
|-----------|------------------|---------|------------------|---------|----------------------|----------|------------------|---------|------------------|---------|----------------------|
|           | Percent Infected | Z score | Percent Infected | Z score |                      |          | Percent Infected | Z score | Percent Infected | Z score |                      |
| NFIL3     | 98.4             | -0.83   | 102.5            | -0.50   | <b>0.33</b>          | LAMP3    | 96.9             | -0.97   | 104.2            | -0.32   | <b>0.65</b>          |
| EIF3EIP   | 105.2            | -0.19   | 108.8            | 0.14    | <b>0.33</b>          | FLJ23556 | 94.4             | -1.21   | 102.0            | -0.55   | <b>0.66</b>          |
| SLFN5     | 121.7            | 1.34    | 124.1            | 1.67    | <b>0.33</b>          | TXNIP    | 111.3            | 0.37    | 118.0            | 1.06    | <b>0.69</b>          |
| IMPA2     | 103.2            | -0.38   | 107.1            | -0.04   | <b>0.34</b>          | TREX1    | 96.1             | -1.04   | 104.0            | -0.35   | <b>0.70</b>          |
| IGFBP2    | 98.9             | -0.78   | 103.2            | -0.42   | <b>0.36</b>          | AGPAT9   | 90.3             | -1.59   | 98.6             | -0.88   | <b>0.70</b>          |
| SP110     | 104.0            | -0.31   | 108.1            | 0.06    | <b>0.37</b>          | MAFF     | 117.6            | 0.96    | 124.1            | 1.67    | <b>0.71</b>          |
| STEAP4    | 97.6             | -0.90   | 102.2            | -0.52   | <b>0.38</b>          | MYD88    | 92.1             | -1.42   | 100.4            | -0.70   | <b>0.72</b>          |
| IFI44     | 100.9            | -0.59   | 105.3            | -0.22   | <b>0.38</b>          | ETV6     | 96.4             | -1.02   | 104.5            | -0.29   | <b>0.72</b>          |
| MAB21L2   | 110.8            | 0.33    | 114.4            | 0.70    | <b>0.38</b>          | EXT1     | 112.1            | 0.44    | 119.3            | 1.19    | <b>0.74</b>          |
| CCDC109B  | 104.7            | -0.24   | 108.8            | 0.14    | <b>0.38</b>          | PSMB8    | 112.6            | 0.49    | 119.8            | 1.24    | <b>0.75</b>          |
| APOBEC3A  | 111.8            | 0.42    | 115.5            | 0.81    | <b>0.38</b>          | THBD     | 87.5             | -1.85   | 96.6             | -1.09   | <b>0.76</b>          |
| TNFSF10   | 122.4            | 1.41    | 125.4            | 1.80    | <b>0.39</b>          | SOCS1    | 97.4             | -0.93   | 105.8            | -0.17   | <b>0.76</b>          |
| CXCL9     | 107.8            | 0.04    | 111.9            | 0.45    | <b>0.40</b>          | PRAME    | 90.1             | -1.61   | 99.2             | -0.83   | <b>0.78</b>          |
| ADAR      | 111.3            | 0.37    | 115.2            | 0.78    | <b>0.41</b>          | SOCS2    | 106.5            | -0.08   | 114.4            | 0.70    | <b>0.78</b>          |
| GALNT2    | 95.1             | -1.14   | 100.2            | -0.73   | <b>0.41</b>          | RBCK1    | 89.3             | -1.68   | 98.6             | -0.88   | <b>0.80</b>          |
| IFI30     | 95.9             | -1.07   | 100.9            | -0.65   | <b>0.41</b>          | PADI2    | 96.4             | -1.02   | 105.3            | -0.22   | <b>0.80</b>          |
| CD74      | 96.1             | -1.04   | 101.2            | -0.63   | <b>0.42</b>          | AIM2     | 97.4             | -0.93   | 106.3            | -0.12   | <b>0.81</b>          |
| CD80      | 116.1            | 0.82    | 119.8            | 1.24    | <b>0.42</b>          | ZNF313   | 128.5            | 1.98    | 135.3            | 2.80    | <b>0.82</b>          |
| CPT1A     | 99.2             | -0.76   | 104.2            | -0.32   | <b>0.44</b>          | BCL3     | 93.6             | -1.28   | 103.2            | -0.42   | <b>0.86</b>          |
| UBE2L6    | 101.4            | -0.55   | 106.5            | -0.09   | <b>0.46</b>          | CCL5     | 103.5            | -0.36   | 112.4            | 0.50    | <b>0.86</b>          |
| PML       | 109.0            | 0.16    | 113.7            | 0.63    | <b>0.47</b>          | SPTLC2   | 103.5            | -0.36   | 112.4            | 0.50    | <b>0.86</b>          |
| TMEM140   | 119.6            | 1.15    | 123.6            | 1.62    | <b>0.47</b>          | PMAIP1   | 97.6             | -0.90   | 107.1            | -0.04   | <b>0.86</b>          |
| C22orf28  | 100.2            | -0.67   | 105.5            | -0.19   | <b>0.47</b>          | S100A8   | 95.1             | -1.14   | 104.8            | -0.27   | <b>0.87</b>          |
| MSR1      | 114.8            | 0.70    | 119.3            | 1.19    | <b>0.49</b>          | ABTB2    | 118.6            | 1.06    | 126.7            | 1.93    | <b>0.87</b>          |
| TRIM5     | 92.1             | -1.42   | 98.1             | -0.93   | <b>0.49</b>          | EPAS1    | 119.9            | 1.18    | 128.0            | 2.06    | <b>0.88</b>          |
| TNFRSF10A | 122.2            | 1.39    | 126.2            | 1.88    | <b>0.49</b>          | GBP1     | 101.4            | -0.55   | 110.9            | 0.34    | <b>0.89</b>          |
| C6orf150  | 99.4             | -0.74   | 105.0            | -0.24   | <b>0.49</b>          | PFKFB3   | 99.4             | -0.74   | 109.1            | 0.17    | <b>0.90</b>          |
| IFI27     | 106.5            | -0.08   | 111.6            | 0.42    | <b>0.50</b>          | CXCL10   | 112.1            | 0.44    | 121.1            | 1.37    | <b>0.92</b>          |
| IFI44L    | 126.5            | 1.79    | 130.2            | 2.29    | <b>0.50</b>          | PXK      | 92.6             | -1.37   | 103.0            | -0.45   | <b>0.93</b>          |
| PPM1K     | 103.7            | -0.34   | 109.1            | 0.17    | <b>0.50</b>          | PHF15    | 114.1            | 0.63    | 123.1            | 1.57    | <b>0.94</b>          |
| IFI6      | 107.5            | 0.02    | 112.9            | 0.55    | <b>0.53</b>          | TDRD7    | 111.8            | 0.42    | 121.1            | 1.37    | <b>0.95</b>          |
| IFIT5     | 95.1             | -1.14   | 101.4            | -0.60   | <b>0.54</b>          | DCP1A    | 118.9            | 1.08    | 127.7            | 2.03    | <b>0.95</b>          |
| TNSF13B   | 108.3            | 0.09    | 113.7            | 0.63    | <b>0.54</b>          | APOL1    | 97.4             | -0.93   | 107.8            | 0.04    | <b>0.96</b>          |
| GTPBP1    | 99.7             | -0.71   | 105.8            | -0.17   | <b>0.55</b>          | SCO2     | 95.6             | -1.09   | 106.3            | -0.12   | <b>0.97</b>          |
| IL15RA    | 106.2            | -0.10   | 111.9            | 0.45    | <b>0.55</b>          | LY6E     | 113.1            | 0.54    | 122.6            | 1.52    | <b>0.98</b>          |
| NDC80     | 112.8            | 0.51    | 118.0            | 1.06    | <b>0.55</b>          | ACSL1    | 101.4            | -0.55   | 111.9            | 0.45    | <b>0.99</b>          |
| SLC1A1    | 99.9             | -0.69   | 106.0            | -0.14   | <b>0.55</b>          | MCL1     | 88.3             | -1.77   | 100.2            | -0.73   | <b>1.04</b>          |
| AQP9      | 91.6             | -1.47   | 98.4             | -0.91   | <b>0.56</b>          | KIAA0040 | 105.2            | -0.19   | 116.0            | 0.86    | <b>1.05</b>          |
| TRIM21    | 95.1             | -1.14   | 101.7            | -0.58   | <b>0.56</b>          | B2M      | 97.6             | -0.90   | 109.1            | 0.17    | <b>1.07</b>          |
| IFIT2     | 99.4             | -0.74   | 105.8            | -0.17   | <b>0.57</b>          | PLEKHA4  | 101.7            | -0.52   | 113.2            | 0.57    | <b>1.10</b>          |
| CD274     | 87.3             | -1.87   | 94.6             | -1.29   | <b>0.58</b>          | MT1X     | 100.7            | -0.62   | 112.4            | 0.50    | <b>1.12</b>          |
| SMAD3     | 98.4             | -0.83   | 105.0            | -0.24   | <b>0.59</b>          | IL1R     | 97.6             | -0.90   | 109.6            | 0.22    | <b>1.12</b>          |
| VAMP5     | 103.0            | -0.41   | 109.3            | 0.19    | <b>0.60</b>          | TRAFD1   | 92.8             | -1.35   | 105.3            | -0.22   | <b>1.13</b>          |
| LGMN      | 97.1             | -0.95   | 104.0            | -0.35   | <b>0.60</b>          | CCL8     | 96.6             | -1.00   | 109.1            | 0.17    | <b>1.16</b>          |
| AHNAK2    | 97.9             | -0.88   | 104.8            | -0.27   | <b>0.61</b>          | OGFR     | 81.7             | -2.39   | 95.3             | -1.22   | <b>1.17</b>          |
| CLEC4E    | 83.2             | -2.25   | 91.2             | -1.62   | <b>0.62</b>          | CLEC4D   | 91.8             | -1.44   | 104.8            | -0.27   | <b>1.17</b>          |
| Fluc      | 93.3             | -1.30   | 100.7            | -0.68   | <b>0.62</b>          | GEM      | 96.4             | -1.02   | 109.3            | 0.19    | <b>1.21</b>          |
| SAT3      | 108.8            | 0.14    | 115.2            | 0.78    | <b>0.64</b>          | ARNTL    | 75.9             | -2.93   | 90.5             | -1.70   | <b>1.23</b>          |
| NCOA3     | 121.9            | 1.36    | 127.4            | 2.01    | <b>0.64</b>          | CD9      | 108.8            | 0.14    | 121.1            | 1.37    | <b>1.23</b>          |
| GZMB      | 113.1            | 0.54    | 119.3            | 1.19    | <b>0.65</b>          | CCL19    | 107.3            | 0.00    | 119.8            | 1.24    | <b>1.24</b>          |

Supplementary Table 1. Large scale ISG screen: VACV WT-GFP+ and vK1L-C7L-/GFP+ in Huh7 cells (Page 4 of 4)

| Gene     | VACV WT-GFP+        |         | vK1L-C7L-/GFP+      |         | Differential<br>Z score | Gene | VACV WT-GFP+        |         | vK1L-C7L-/GFP+      |         | Differential<br>Z score |
|----------|---------------------|---------|---------------------|---------|-------------------------|------|---------------------|---------|---------------------|---------|-------------------------|
|          | Percent<br>Infected | Z score | Percent<br>Infected | Z score |                         |      | Percent<br>Infected | Z score | Percent<br>Infected | Z score |                         |
| GPX2     | 99.9                | -0.69   | 113.2               | 0.57    | <b>1.26</b>             |      |                     |         |                     |         |                         |
| CTCF     | 99.2                | -0.76   | 112.7               | 0.52    | <b>1.28</b>             |      |                     |         |                     |         |                         |
| CCDC75   | 113.8               | 0.61    | 126.4               | 1.90    | <b>1.30</b>             |      |                     |         |                     |         |                         |
| HESX1    | 107.8               | 0.04    | 120.8               | 1.34    | <b>1.30</b>             |      |                     |         |                     |         |                         |
| ENPP1    | 118.6               | 1.06    | 131.0               | 2.37    | <b>1.31</b>             |      |                     |         |                     |         |                         |
| TMEM49   | 94.1                | -1.23   | 108.6               | 0.11    | <b>1.35</b>             |      |                     |         |                     |         |                         |
| TRIM34   | 92.6                | -1.37   | 107.3               | -0.01   | <b>1.36</b>             |      |                     |         |                     |         |                         |
| ANKFY1   | 132.0               | 2.31    | 144.0               | 3.67    | <b>1.36</b>             |      |                     |         |                     |         |                         |
| DEFB1    | 109.5               | 0.21    | 123.1               | 1.57    | <b>1.36</b>             |      |                     |         |                     |         |                         |
| PDK1     | 92.1                | -1.42   | 107.1               | -0.04   | <b>1.38</b>             |      |                     |         |                     |         |                         |
| CMAH     | 102.4               | -0.45   | 116.7               | 0.93    | <b>1.39</b>             |      |                     |         |                     |         |                         |
| PMM2     | 97.1                | -0.95   | 112.1               | 0.47    | <b>1.42</b>             |      |                     |         |                     |         |                         |
| SAA1     | 94.1                | -1.23   | 109.3               | 0.19    | <b>1.42</b>             |      |                     |         |                     |         |                         |
| DYNLT1   | 101.9               | -0.50   | 116.7               | 0.93    | <b>1.43</b>             |      |                     |         |                     |         |                         |
| LEPR     | 104.5               | -0.26   | 119.5               | 1.21    | <b>1.48</b>             |      |                     |         |                     |         |                         |
| RPL22    | 103.5               | -0.36   | 119.5               | 1.21    | <b>1.57</b>             |      |                     |         |                     |         |                         |
| CCL4     | 96.4                | -1.02   | 113.2               | 0.57    | <b>1.59</b>             |      |                     |         |                     |         |                         |
| INDO     | 91.3                | -1.49   | 108.8               | 0.14    | <b>1.63</b>             |      |                     |         |                     |         |                         |
| SERPING1 | 95.9                | -1.07   | 113.9               | 0.65    | <b>1.72</b>             |      |                     |         |                     |         |                         |
| TRIM38   | 91.3                | -1.49   | 110.1               | 0.27    | <b>1.76</b>             |      |                     |         |                     |         |                         |
| CDKN1A   | 112.3               | 0.47    | 129.7               | 2.24    | <b>1.77</b>             |      |                     |         |                     |         |                         |
| C15orf48 | 103.7               | -0.34   | 122.1               | 1.47    | <b>1.81</b>             |      |                     |         |                     |         |                         |
| LINCR    | 90.6                | -1.56   | 110.6               | 0.32    | <b>1.88</b>             |      |                     |         |                     |         |                         |
| IFITM2   | 89.8                | -1.63   | 110.6               | 0.32    | <b>1.95</b>             |      |                     |         |                     |         |                         |
| CREB3L3  | 90.1                | -1.61   | 111.6               | 0.42    | <b>2.03</b>             |      |                     |         |                     |         |                         |
| PLSCR1   | 108.3               | 0.09    | 128.7               | 2.14    | <b>2.05</b>             |      |                     |         |                     |         |                         |
| FKBP5    | 100.4               | -0.64   | 122.6               | 1.52    | <b>2.16</b>             |      |                     |         |                     |         |                         |
| C2orf31  | 97.4                | -0.93   | 122.3               | 1.50    | <b>2.42</b>             |      |                     |         |                     |         |                         |
| MAP3K5   | 109.8               | 0.23    | 137.6               | 3.03    | <b>2.80</b>             |      |                     |         |                     |         |                         |
| CHMP5    | 111.8               | 0.42    | 139.9               | 3.26    | <b>2.84</b>             |      |                     |         |                     |         |                         |
